# Supplementary material
Source: ML conference proceedings conference paper supplement (https://openaccess.thecvf.com/content/CVPR2023/html/Wen_CAP-VSTNet_Content_Affinity_CVPR_2023_paper.html)
Supplement: Supplementary file 1 [file Wen_CAP-VSTNet_Content_Affinity_CVPR_2023_supplemental.zip › supplementary.pdf]

## A. Pseudocode of CAP-VSTNet

---

**Algorithm 1:** Video style transfer process of CAP-VSTNet

---

**Input:** content frames  $\{I_c^j\}_{j=1}^N$ , style image  $I_s$ , the proposed new framework CAP-VSTNet which consists an unbiased style transfer module cWCT;

**Optional:** content semantic masks  $\{M_c^j\}_{j=1}^N$ , style semantic mask  $M_s$ ;

**Result:** stylized frames  $\{I_{cs}^j\}_{j=1}^N$ ;

- 1 feed  $I_s$  to CAP-VSTNet and perform the forward inference of CAP-VSTNet to obtain the style feature  $f_s$ ;
- 2 **for**  $j \leftarrow 1$  **to**  $N$  **do**
- 3     feed  $I_c^j$  to CAP-VSTNet and perform the forward inference of CAP-VSTNet to obtain the content feature  $f_c^j$ ;
- 4     **if** semantic masks  $M_c^j$  and  $M_s$  are provided **then** feed  $f_c^j, f_s, M_c^j, M_s$  to cWCT and obtain the stylized feature  $f_{cs}^j$ ;
- 5     **else** feed  $f_c^j, f_s$  to cWCT and obtain the stylized feature  $f_{cs}^j$ ;
- 6     perform the backward inference of CAP-VSTNet to obtain the stylized frame  $I_{cs}^j$ ;
- 7 **end**

---

## B. Unbiased Transformation Module

We show that the whitening and coloring transforms in cWCT is an unbiased style transfer module. Suppose we have a style transfer module  $f_{cs} = C(f_c)S(f_s)$ , where  $C, S$  denote the content and style factor, and  $f_c, f_s$  denote the content and style feature. ArtFlow defines that  $f_{cs}$  is an unbiased style transfer module if  $C(f_{cs}) = C(f_c)$  and  $S(f_{cs}) = S(f_s)$ .

Without loss of generality, we assume both  $f_c$  and  $f_s$  are centered. We have,

$$\begin{aligned} \text{Whitening} : \hat{f}_c &= L_c^{-1} f_c, \\ \text{Coloring} : f_{cs} &= L_s \hat{f}_c. \end{aligned} \quad (1)$$

where  $f_c f_c^T = L_c L_c^T$ ,  $f_s f_s^T = L_s L_s^T$  and  $L$  is a triangular matrix. Therefore,

$$f_{cs} = L_s L_c^{-1} f_c. \quad (2)$$

Here,

$$C(f) = L^{-1} f, S(f) = L. \quad (3)$$

Since,

$$f_{cs} f_{cs}^T = f_s f_s^T = L_s L_s^T, \quad (4)$$

We have,

$$C(f_{cs}) = L_s^{-1} f_{cs} = L_c^{-1} f_c = C(f_c), \quad (5)$$

$$S(f_{cs}) = L_s = S(f_s). \quad (6)$$

Therefore, cWCT is unbiased.

## C. Style Interpolation

We investigate the linear interpolation of extracted style representations by CAP-VSTNet. Considering the feature covariance matrices  $\Sigma_A$  and  $\Sigma_B$  of style images  $I_A$  and  $I_B$ , the interpolated  $\Sigma_s$  should be:

$$\Sigma_s = (1 - \alpha)\Sigma_A + \alpha\Sigma_B \quad (7)$$

where  $\alpha$  is the style ratio between the two. Figure 1 and 2 present the smooth transformation from one style image to another.

## D. Comparison with ArtFlow

Figure 3 and 4 show the comparisons with ArtFlow.

## E. Photorealistic Image Style Transfer

Figure 5 and 6 show the comparisons with advanced photorealistic image style transfer methods.

## F. Video Style Transfer

Figure 7, 8, 9 and 10 show the comparisons with advanced photorealistic video and artistic video style transfer methods.

## G. Ultra-Resolution Photorealistic Style Transfer

Figure 11 and 12 show the ultra-resolution (4K) photorealistic stylization results of CAP-VSTNet.

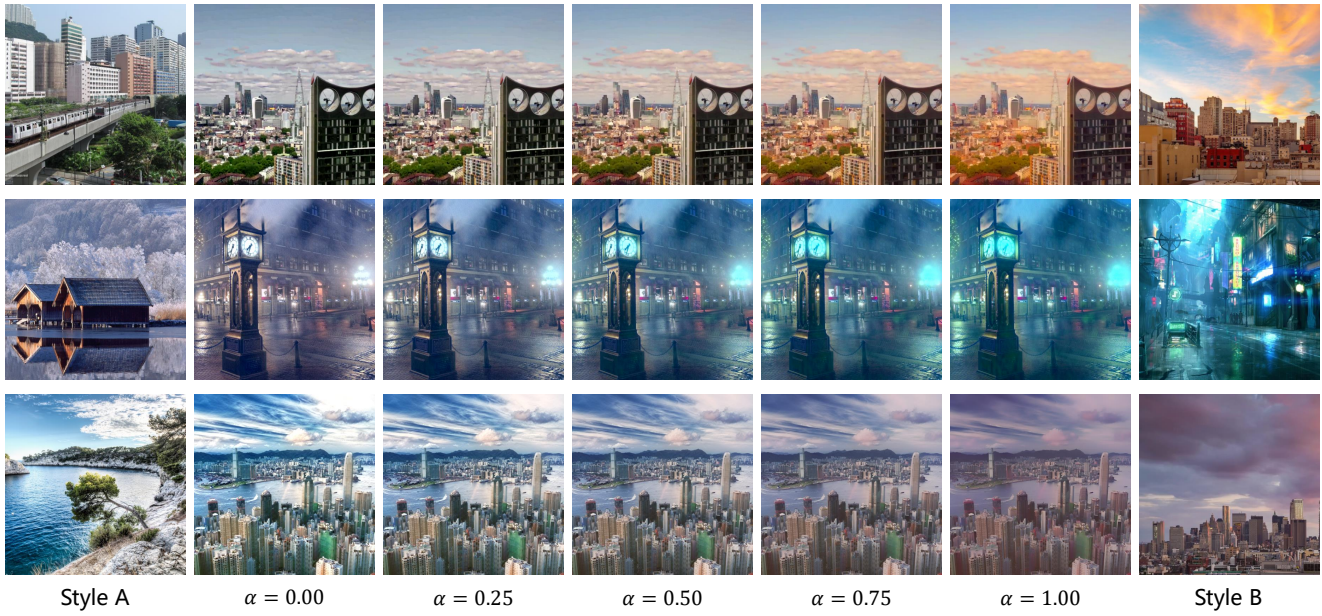

Figure 1. Style interpolation results of CAP-VSTNet on photorealistic style transfer.

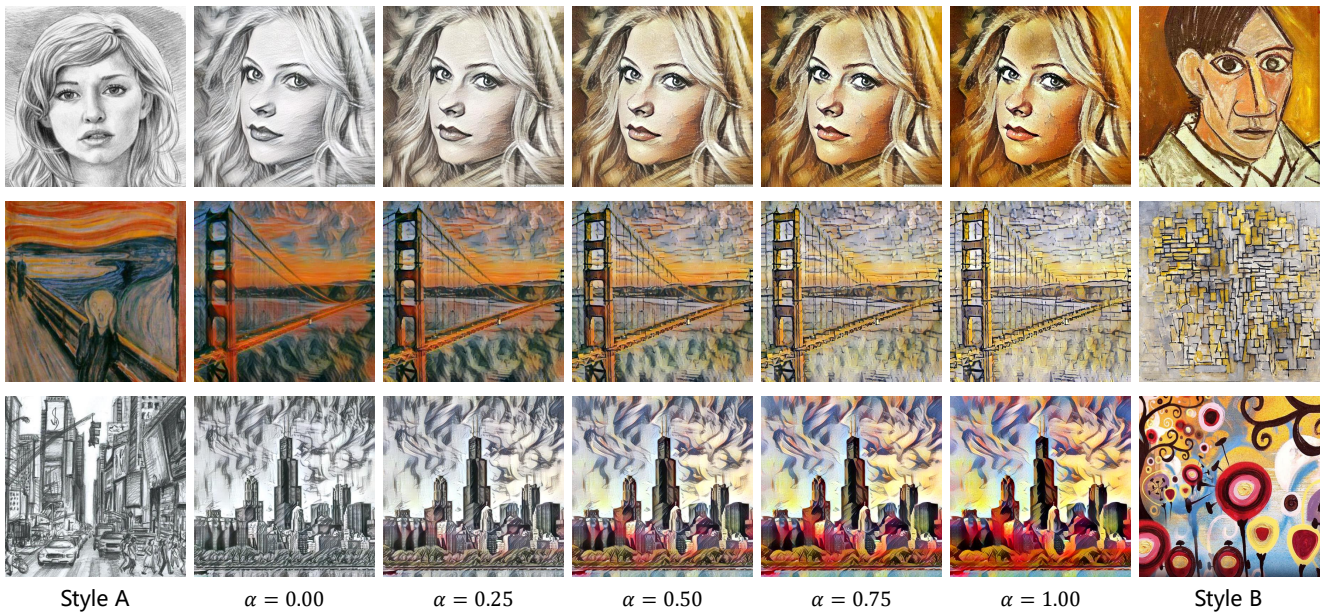

Figure 2. Style interpolation results of CAP-VSTNet on artistic style transfer.

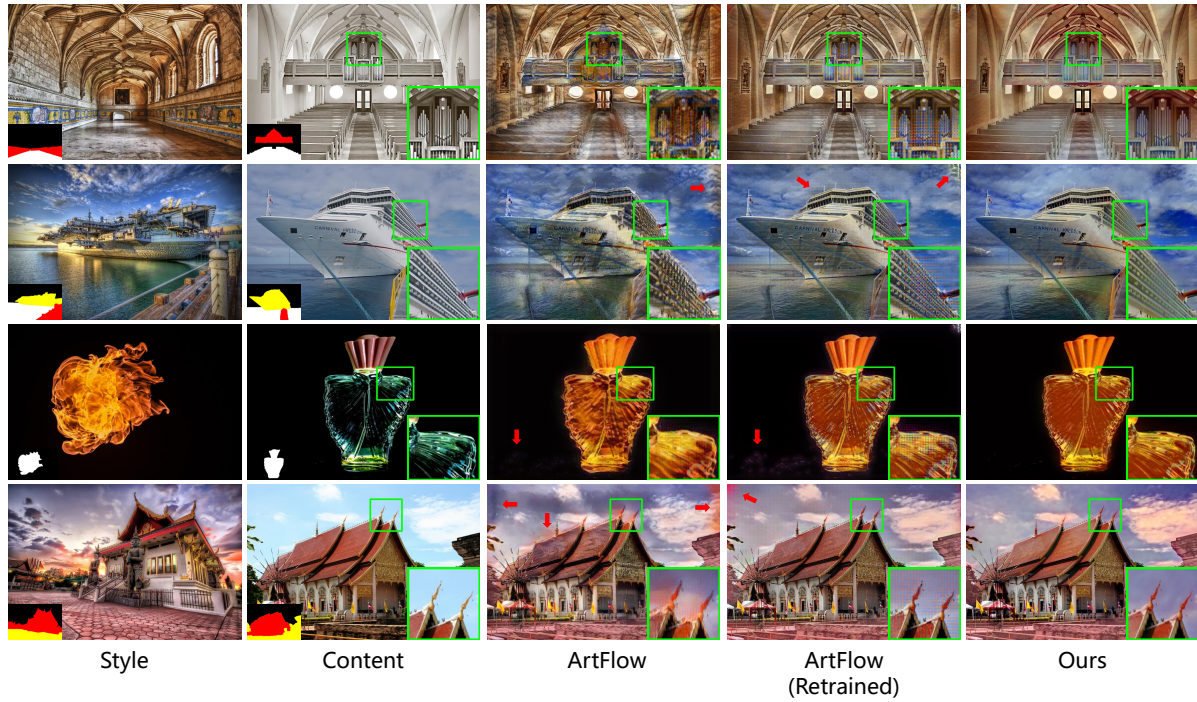

Figure 3. Visual comparisons with ArtFlow on photorealistic style transfer. We retrain ArtFlow on the Microsoft COCO (photorealistic) dataset, in order to avoid the problem of domain gap. We only increase the content loss weight to preserve more content.

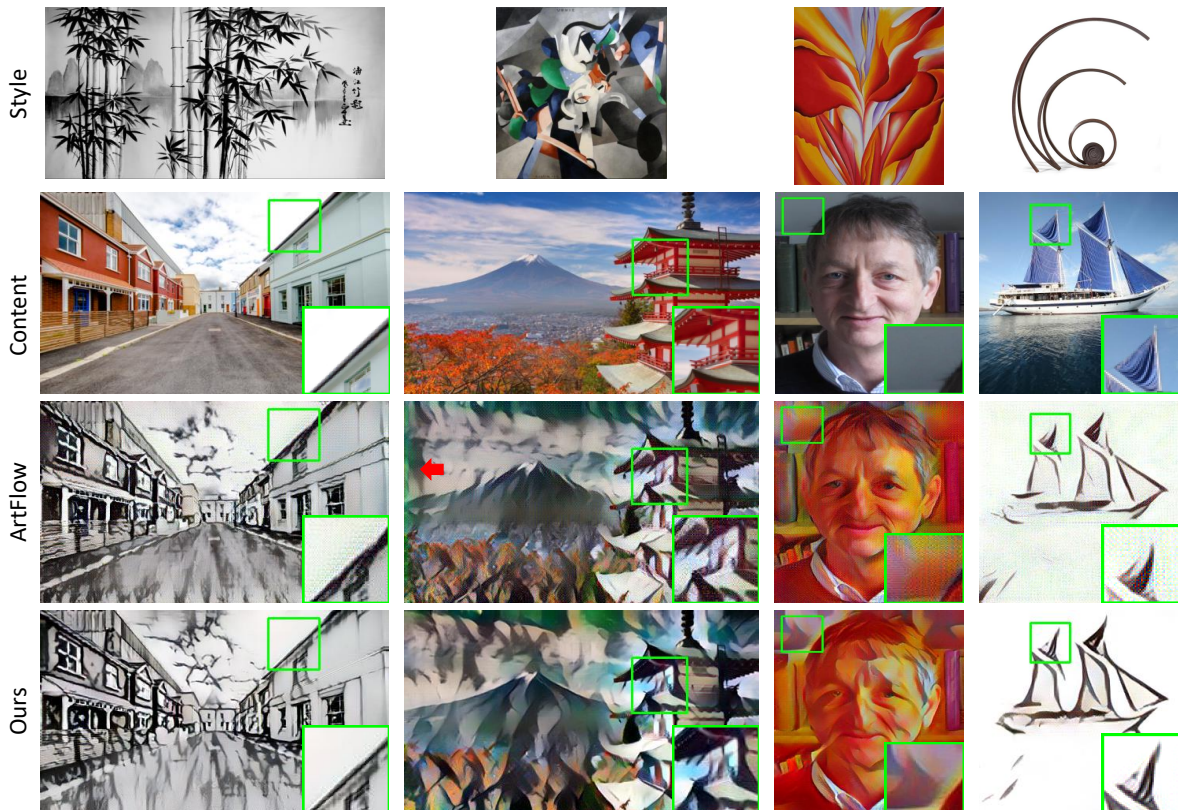

Figure 4. Visual comparisons with ArtFlow on artistic style transfer.

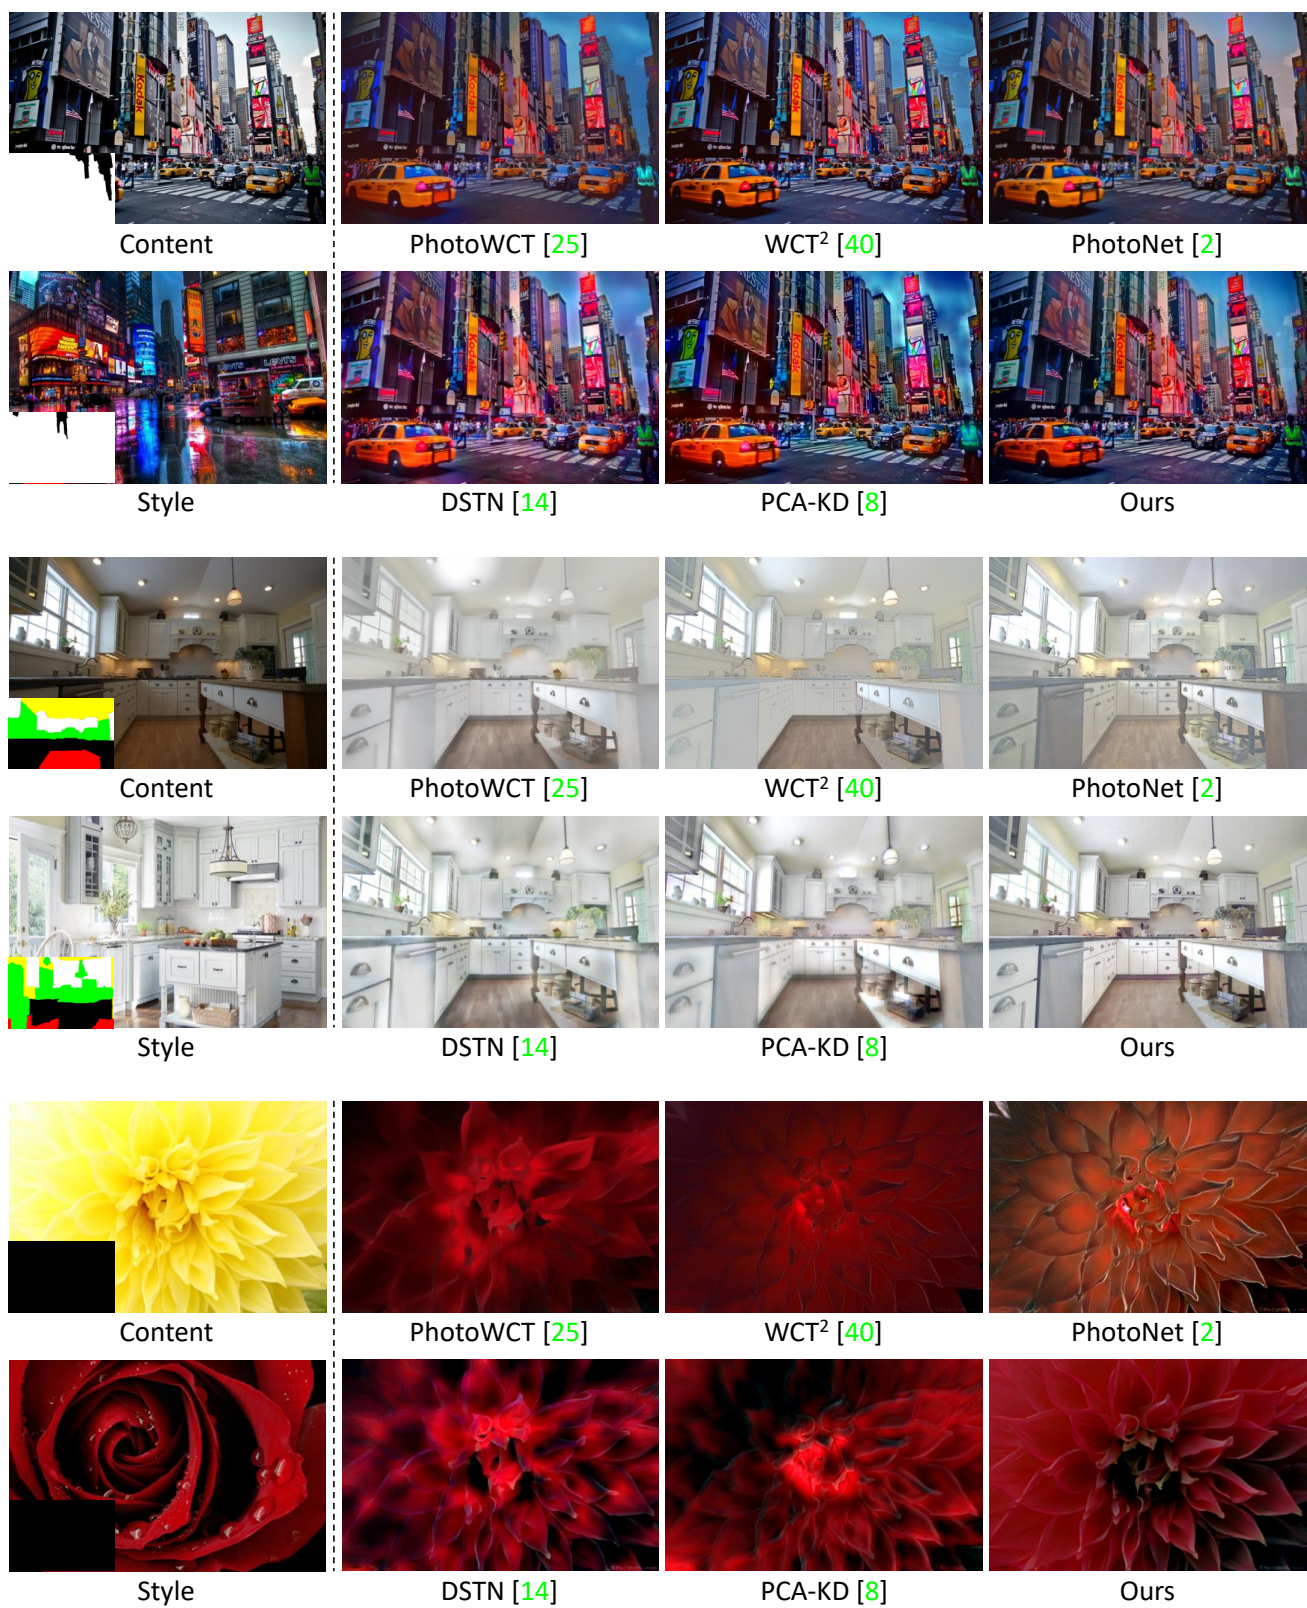

Figure 5. Visual comparisons of photorealistic image style transfer.

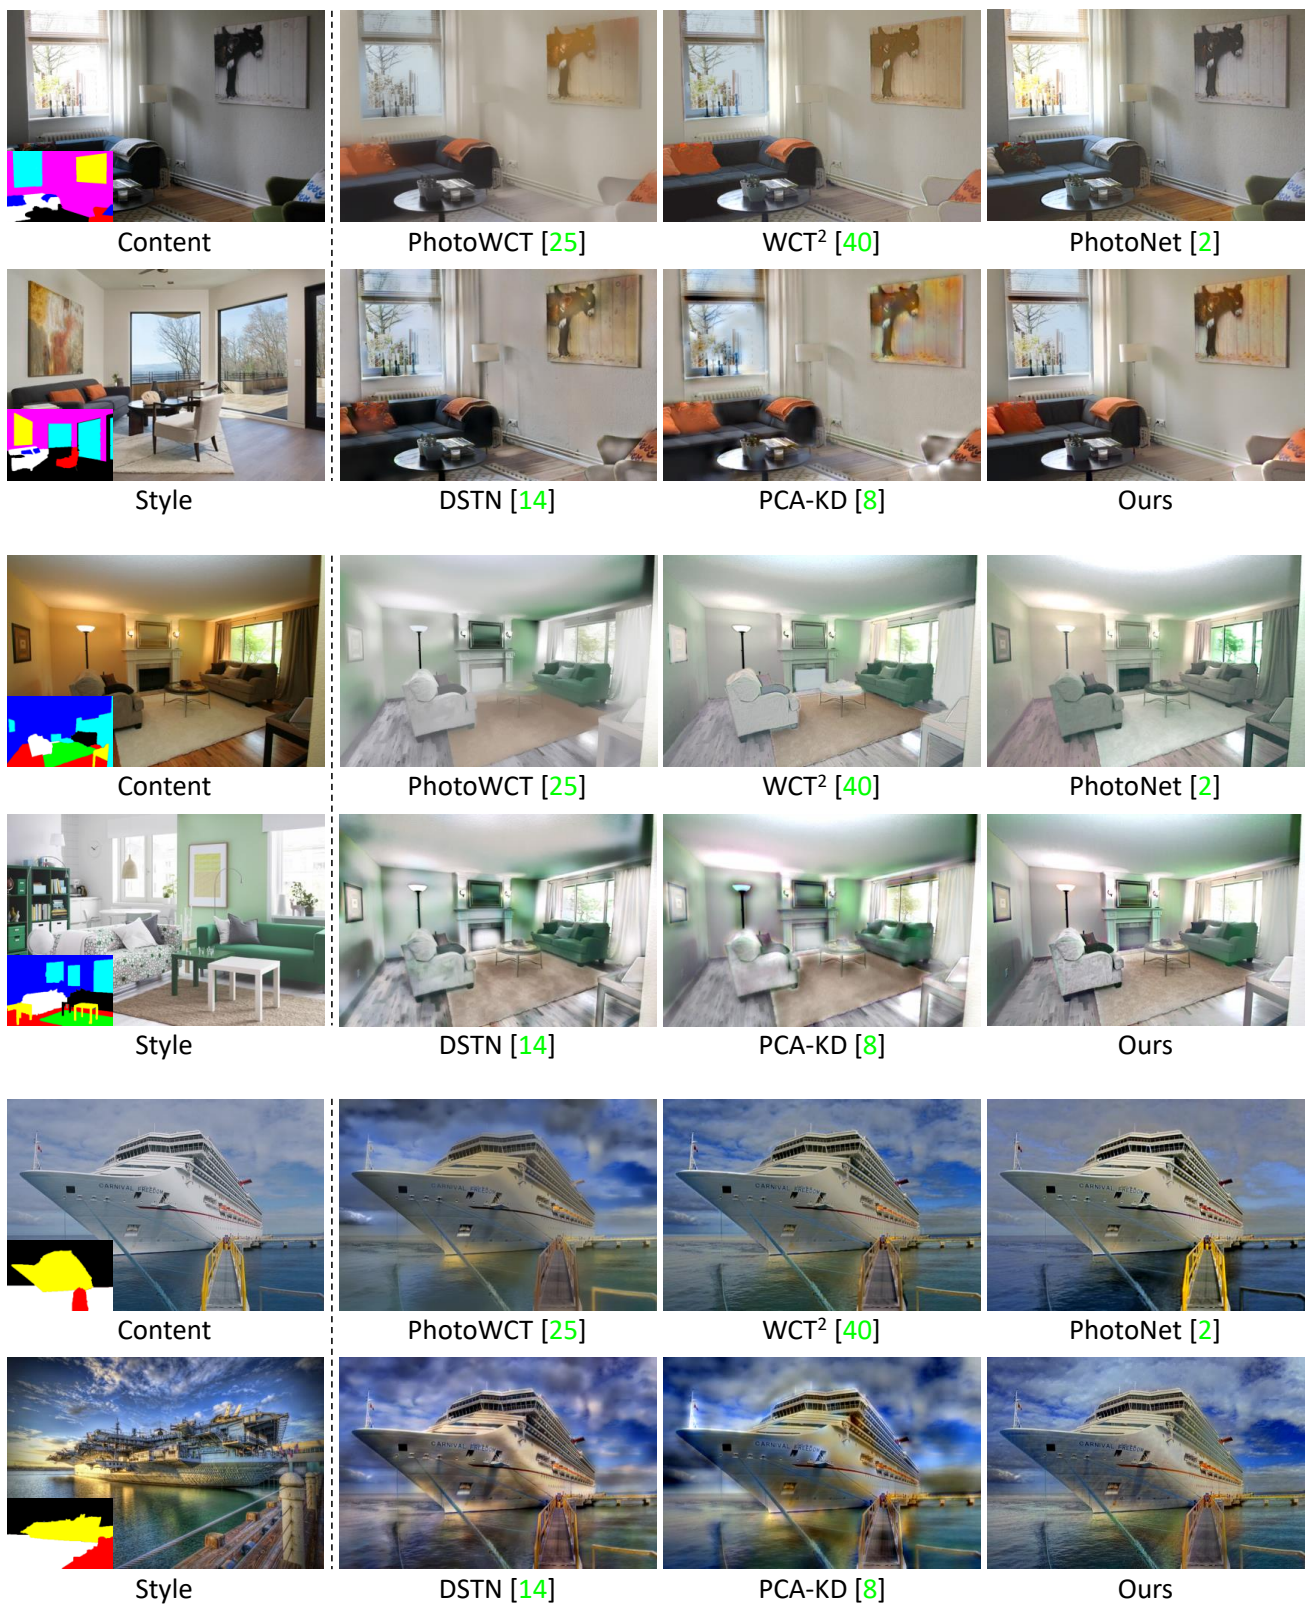

Figure 6. Visual comparisons of photorealistic image style transfer.

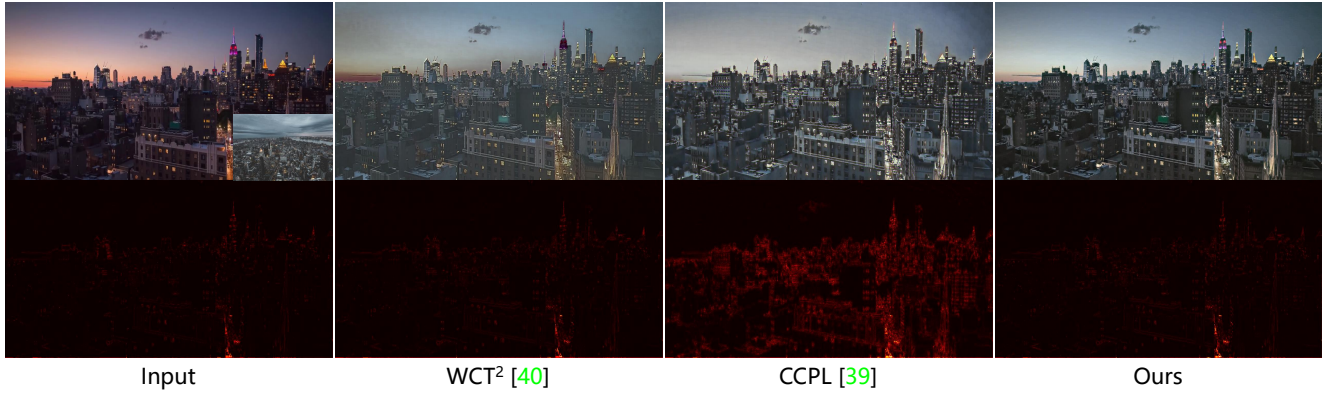

Figure 7. Visual comparison of photorealistic video style transfer. The odd rows show the stylization effect. The even rows show the temporal error heatmap of adjacent frames.

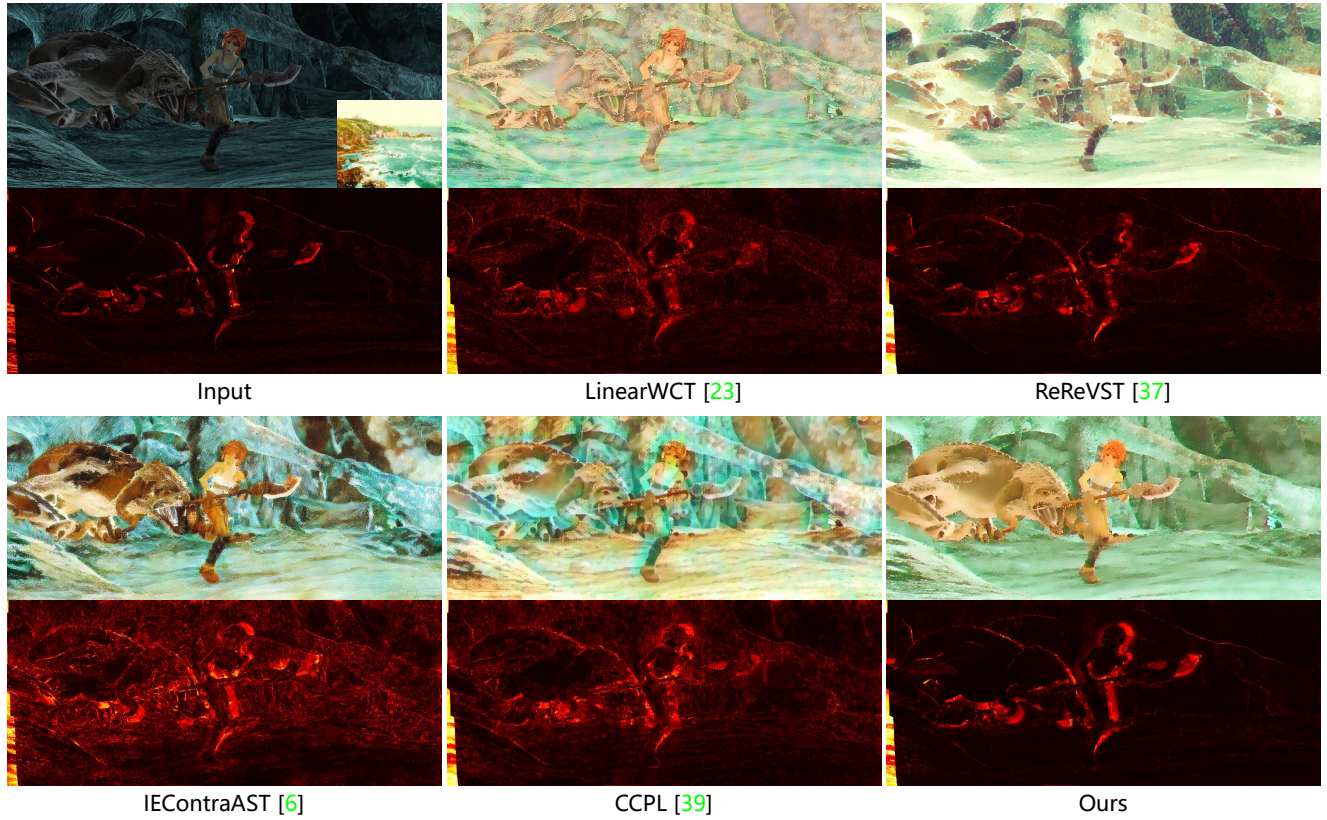

Figure 8. Visual comparison of artistic video style transfer. The odd rows show the stylization effect. The even rows show the temporal error heatmap of adjacent frames.

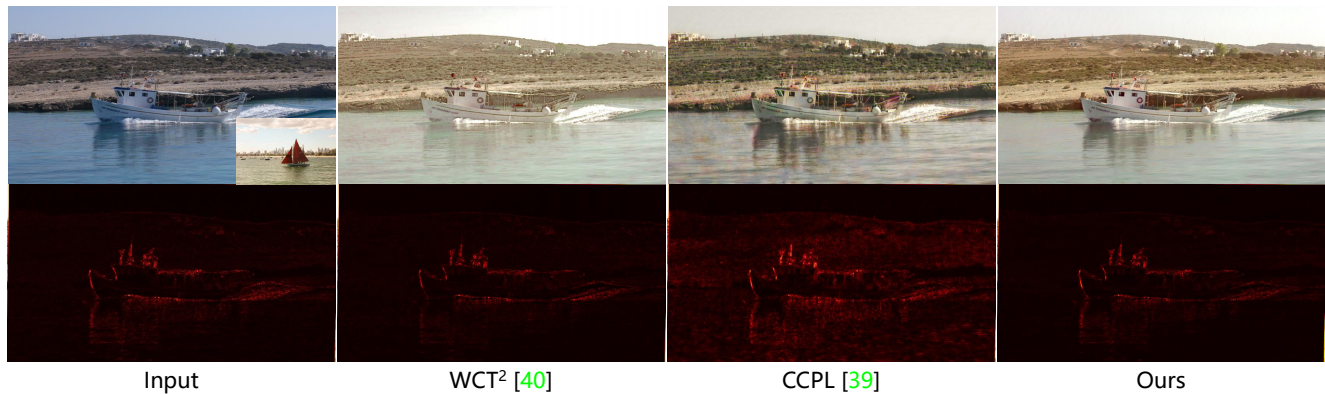

Figure 9. Visual comparison of photorealistic video style transfer. The odd rows show the stylization effect. The even rows show the temporal error heatmap of adjacent frames.

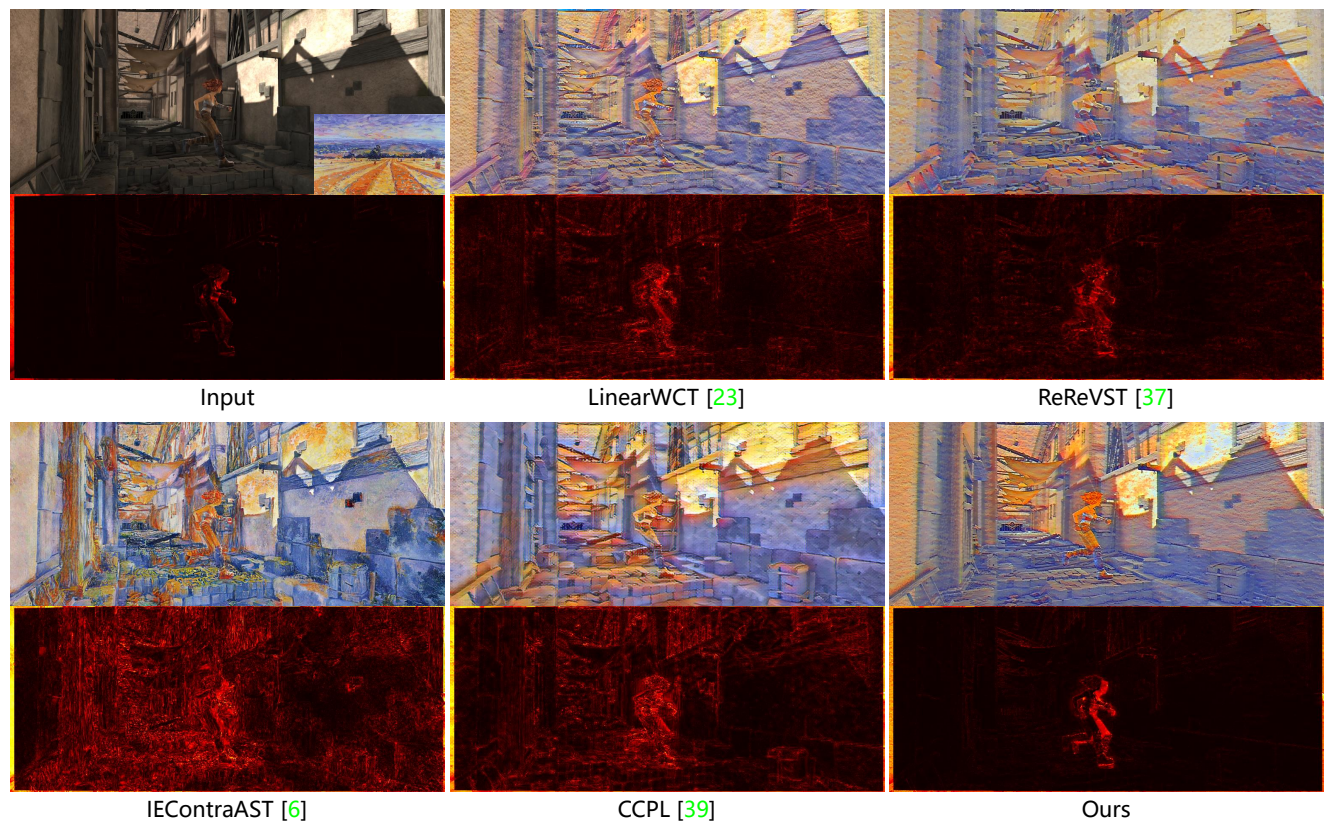

Figure 10. Visual comparison of artistic video style transfer. The odd rows show the stylization effect. The even rows show the temporal error heatmap of adjacent frames.

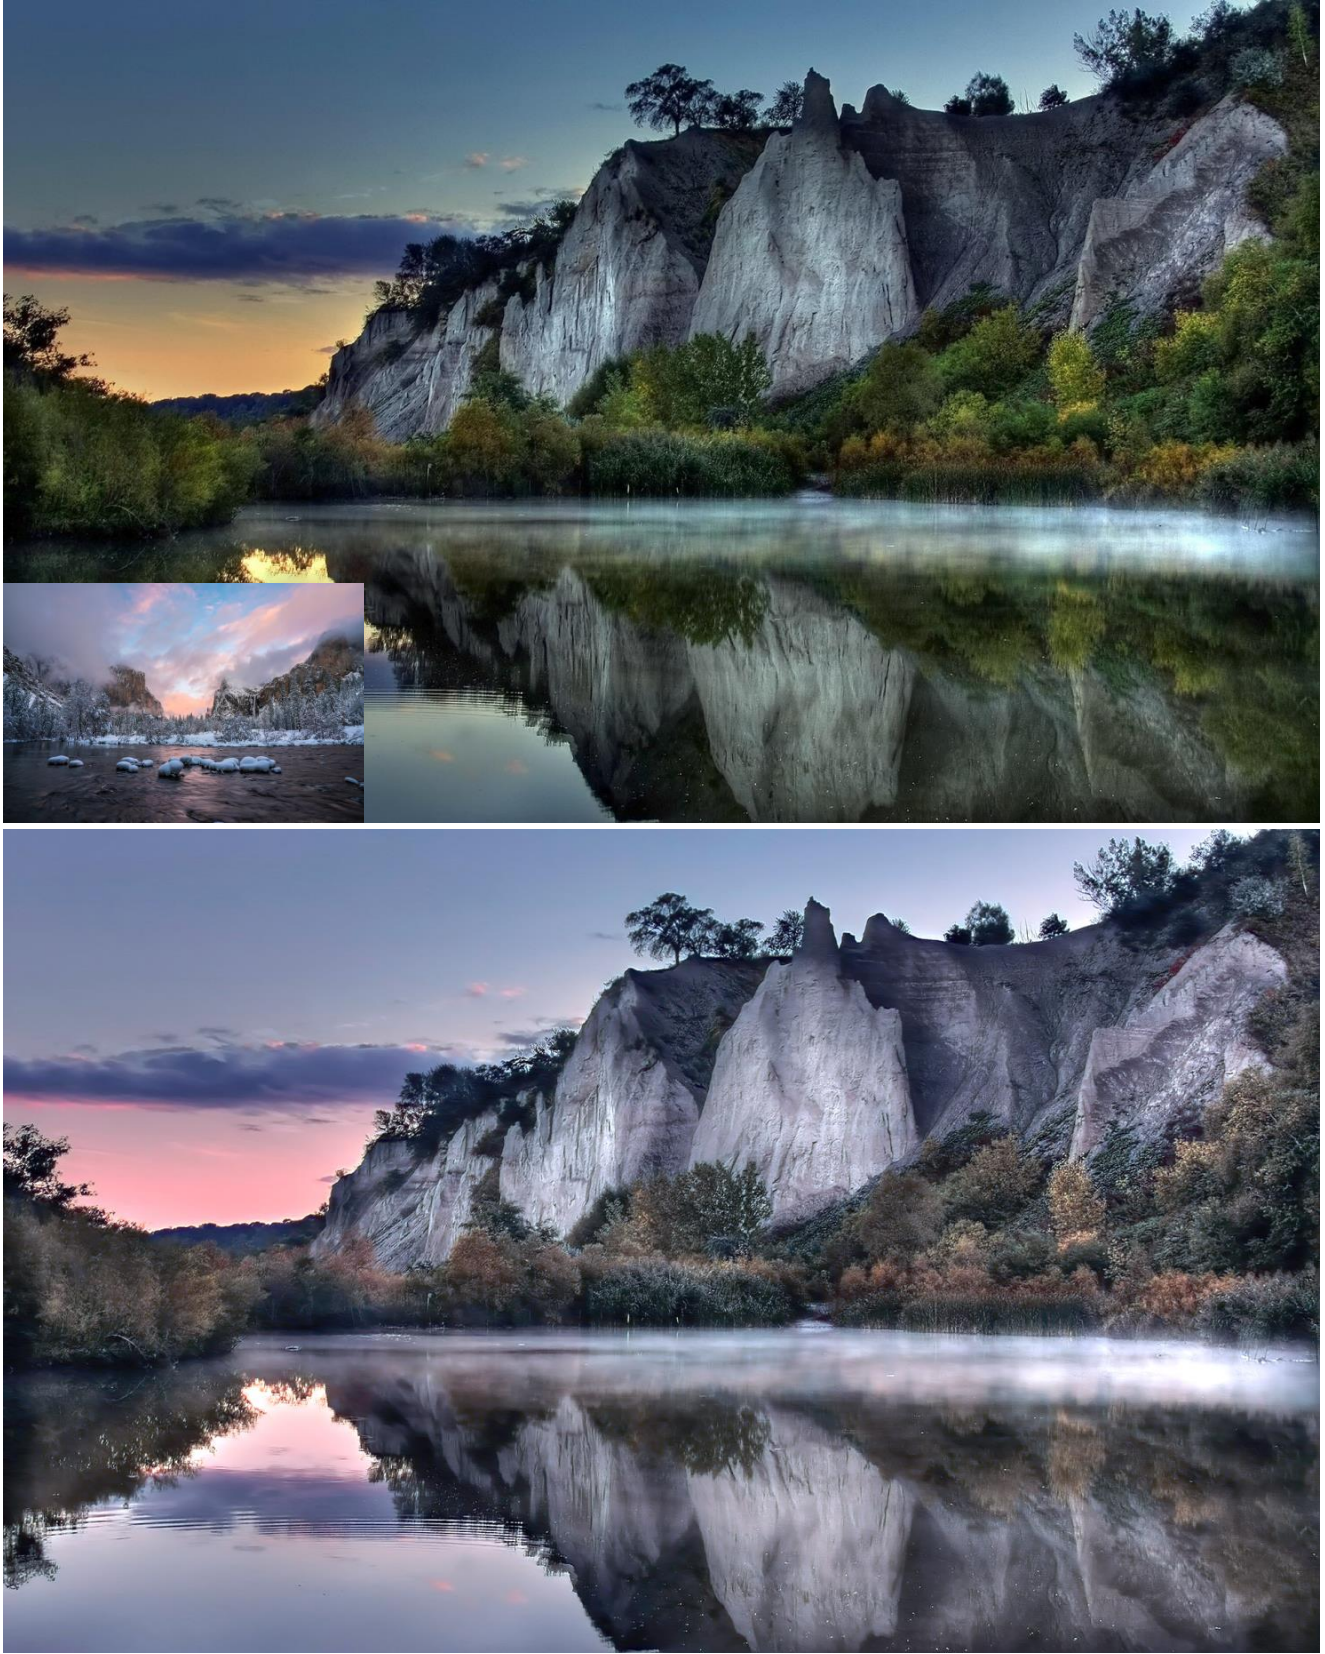

Figure 11. An example of ultra-resolution (4K) photorealistic style transfer generated by CAP-VSTNet.

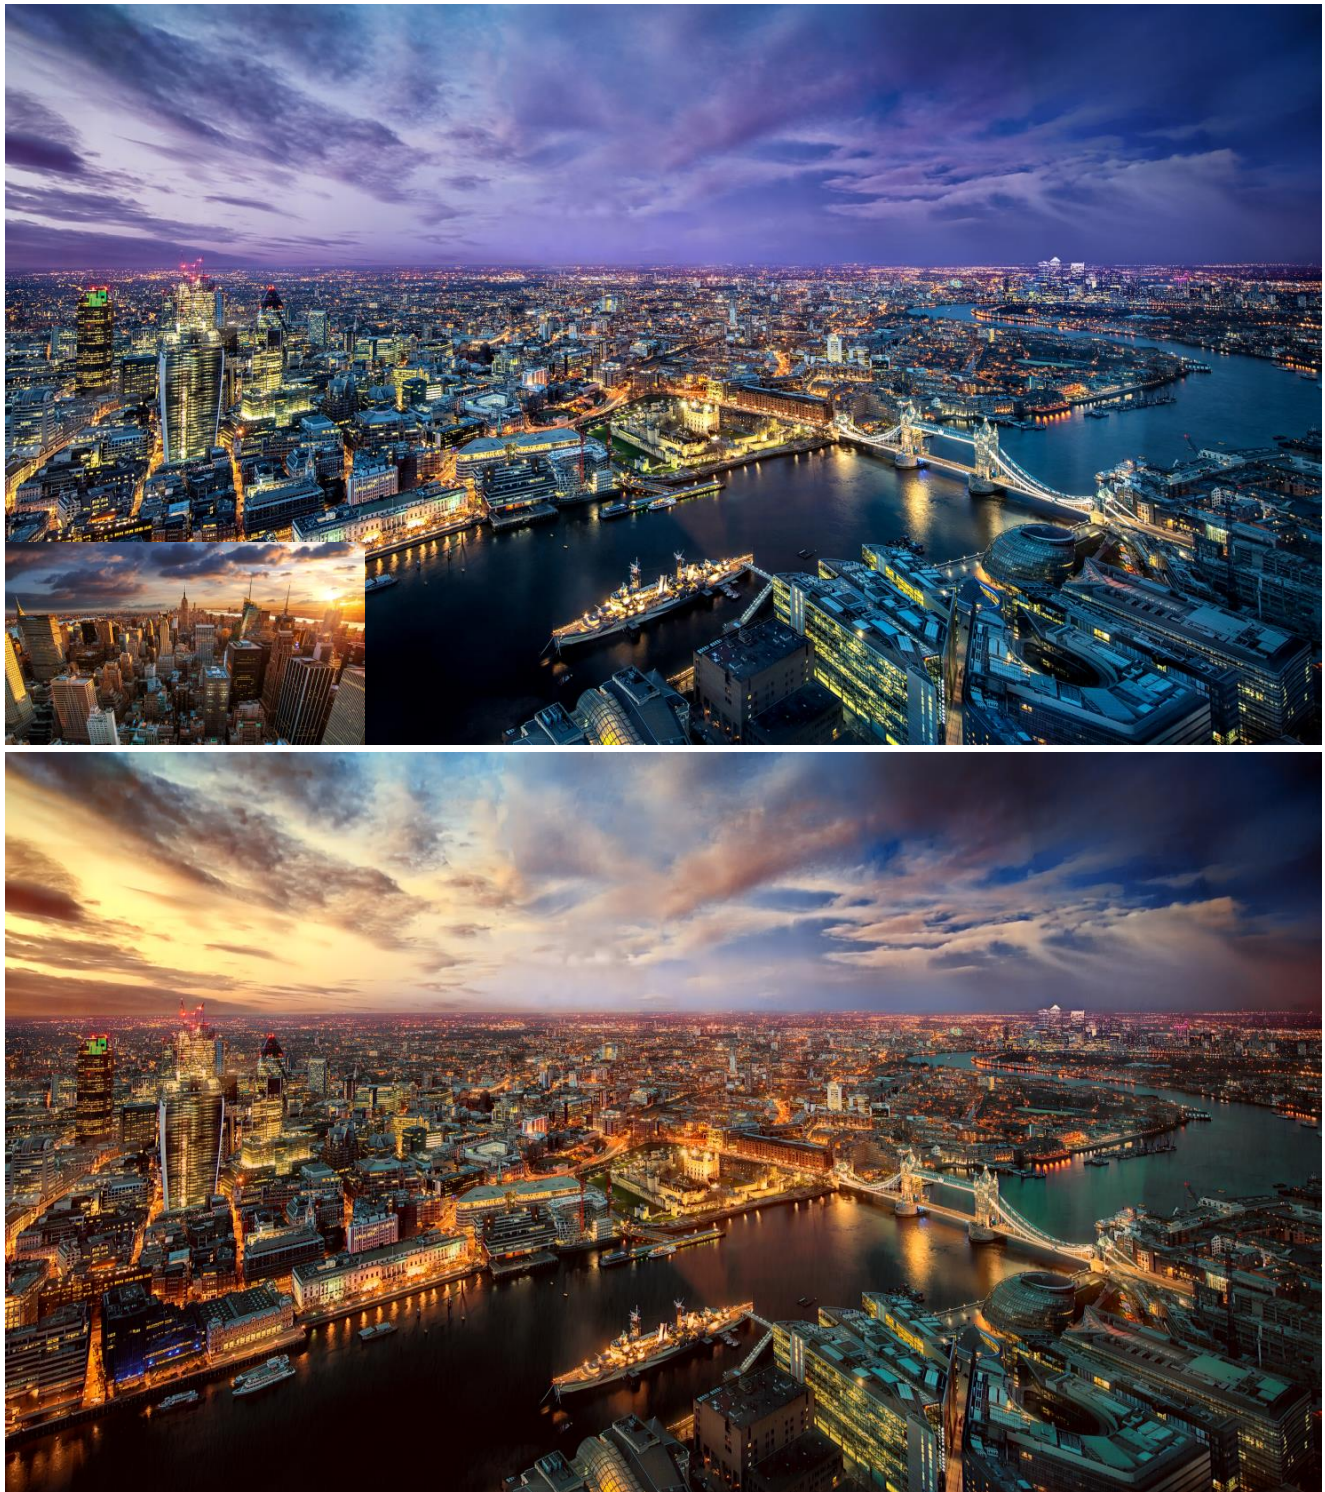

Figure 12. An example of ultra-resolution (4K) photorealistic style transfer generated by CAP-VSTNet.
